# Supplementary material for: Risk factors for migraine disease progression: a narrative review for a patient-centered approach
Source: Springer Nature journal article supplement (doi:10.1007/s00415-023-11880-2), 2023-08-24

## Supplementary Figure 1. Visual abstract of migraine progression

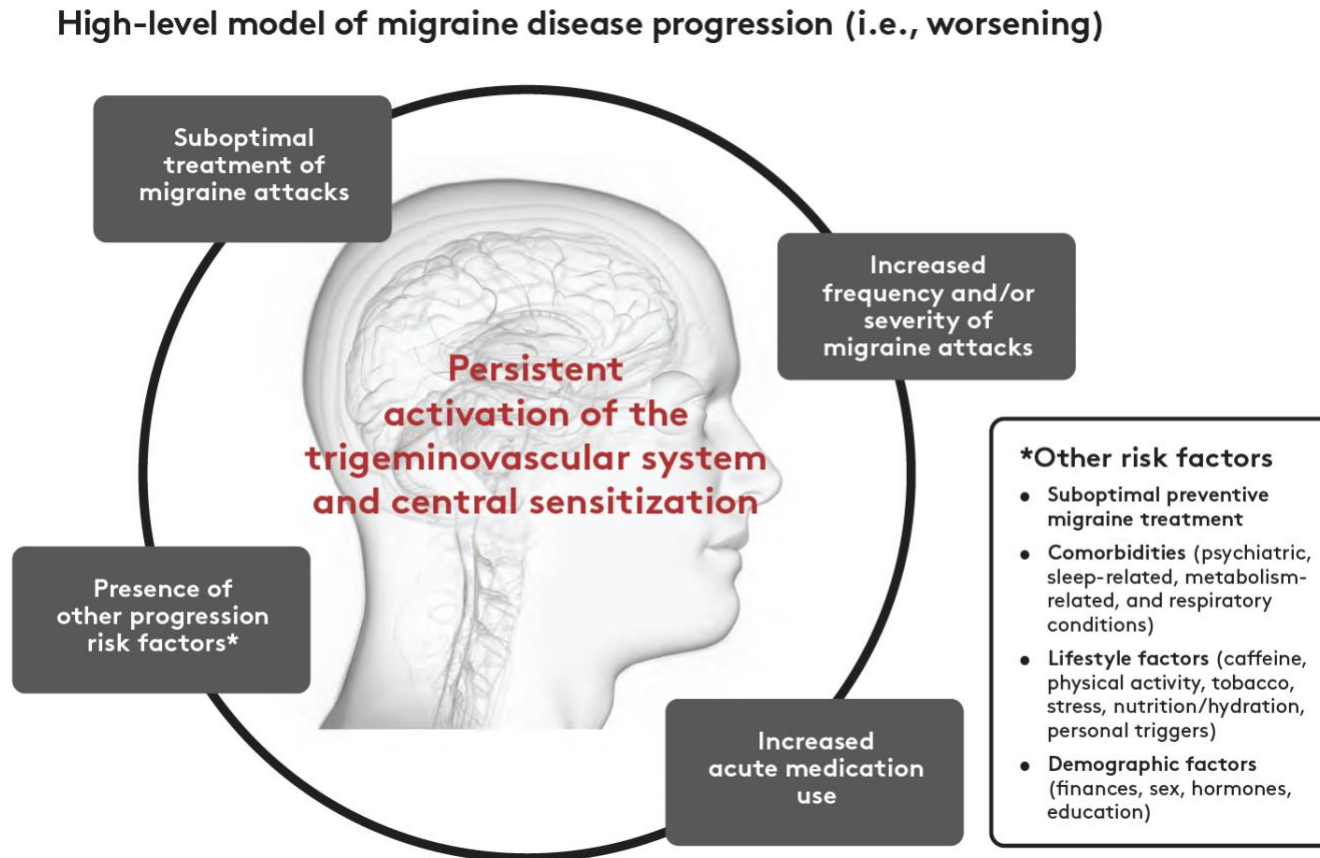

Supplement: MOESM1 [file 415_2023_11880_MOESM1_ESM.pdf]
